# Supplementary material for: Fusion and Fission of Genes Define a Metric between Fungal Genomes
Source: PLoS Comput Biol. 2008 Oct 24;4(10):e1000200. doi: 10.1371/journal.pcbi.1000200 (PMC2557144; doi:10.1371/journal.pcbi.1000200)
Supplement: Dataset S2 — Event compositions. Syntax: [ Event_name , type = type_number tab Group_name : : tab Merge_name ( List_of_Group_names ) # if necessary : : tab Group_name = Group_name # Group-Group relation : : tab Merge_name = Group_name # Merge-Group relation ] Type numbers: 1) Undecideable; 2) Fusion; 3) Fission; 4) Multiple. A relation is always written with the E-group on the left side and the C-group on the right. (0.41 MB TDS) [file pcbi.1000200.s004.tds]

[ GFE-0001 , type = 1
	NECR-3988
	RHOR-1907
	RHOR-8424
	RHOR-1907=NECR-3988
	RHOR-8424=NECR-3988
]
[ GFE-0002 , type = 2
	ASNI-6481
	ASNI-778
	ASNI-M4893 ( ASNI-7243 ASNI-7240 ASNI-7242 )
	CAAL-745
	CAAL-M8966 ( CAAL-5142 CAAL-5143 CAAL-5144 CAAL-5139 CAAL-5140 )
	CAGL-2311
	CAGL-M8447 ( CAGL-4388 CAGL-4381 CAGL-4382 CAGL-4384 CAGL-4385 CAGL-4386 CAGL-4387 )
	CRNE-1597
	CRNE-M9183 ( CRNE-5543 CRNE-5537 CRNE-5538 )
	DEHA-891
	DEHA-M8131 ( DEHA-5166 DEHA-5169 DEHA-5170 DEHA-5172 )
	ERGO-1690
	ERGO-M9480 ( ERGO-4194 ERGO-4196 ERGO-4197 ERGO-4198 )
	KLLA-3131
	KLLA-M9815 ( KLLA-4532 KLLA-4533 KLLA-4535 KLLA-4529 KLLA-4530 )
	NECR-4357
	NECR-M6600 ( NECR-9384 NECR-9386 NECR-9378 NECR-9380 NECR-9381 NECR-9383 )
	RHOR-3700
	RHOR-M10124 ( RHOR-10476 RHOR-2499 RHOR-10470 RHOR-10472 RHOR-10473 RHOR-10475 )
	SACE-854
	SACE-M10422 ( SACE-800 SACE-5381 SACE-5382 SACE-5383 SACE-5384 SACE-5385 SACE-5386 )
	YALI-4935
	YALI-M3844 ( YALI-5231 YALI-5232 YALI-5235 YALI-5233 YALI-5234 )
	ASNI-6481=ASNI-778
	ASNI-M4893=ASNI-778
	CAAL-745=ASNI-778
	CAAL-M8966=ASNI-778
	CAGL-2311=ASNI-778
	CAGL-M8447=ASNI-778
	CRNE-1597=ASNI-778
	CRNE-M9183=ASNI-778
	DEHA-891=ASNI-778
	DEHA-M8131=ASNI-778
	ERGO-1690=ASNI-778
	ERGO-M9480=ASNI-778
	KLLA-3131=ASNI-778
	KLLA-M9815=ASNI-778
	NECR-4357=ASNI-778
	NECR-M6600=ASNI-778
	RHOR-3700=ASNI-778
	RHOR-M10124=ASNI-778
	SACE-854=ASNI-778
	SACE-M10422=ASNI-778
	YALI-4935=ASNI-778
	YALI-M3844=ASNI-778
]
[ GFE-0003 , type = 1
	RHOR-5716
	RHOR-7335
	RHOR-M207 ( RHOR-3605 RHOR-690 )
	RHOR-5716=RHOR-7335
	RHOR-M207=RHOR-7335
]
[ GFE-0004.001 , type = 1
	ASNI-7610
	NECR-5077
	NECR-6225
	NECR-5077=ASNI-7610
	NECR-6225=ASNI-7610
]
[ GFE-0004.002 , type = 1
	ASNI-2425
	ASNI-7610
	NECR-5077
	ASNI-2425=NECR-5077
	ASNI-7610=NECR-5077
]
[ GFE-0005 , type = 3
	CAAL-1611
	CAAL-1612
	CAGL-1546
	CRNE-697
	ERGO-1418
	KLLA-3672
	RHOR-374
	SACE-2657
	SCPO-45
	YALI-565
	CAAL-1611=CAGL-1546
	CAAL-1611=CRNE-697
	CAAL-1611=ERGO-1418
	CAAL-1611=RHOR-374
	CAAL-1611=SACE-2657
	CAAL-1611=SCPO-45
	CAAL-1611=YALI-565
	CAAL-1612=CAGL-1546
	CAAL-1612=CRNE-697
	CAAL-1612=ERGO-1418
	CAAL-1612=KLLA-3672
	CAAL-1612=RHOR-374
	CAAL-1612=SACE-2657
	CAAL-1612=SCPO-45
	CAAL-1612=YALI-565
	CAAL-1611=KLLA-3672
]
[ GFE-0006 , type = 1
	RHOR-10892
	RHOR-M4050 ( RHOR-10956 RHOR-10957 )
	RHOR-M5437 ( RHOR-8846 RHOR-10828 RHOR-10935 )
	RHOR-M4050=RHOR-10892
	RHOR-M5437=RHOR-10892
]
[ GFE-0007 , type = 1
	RHOR-7341
	RHOR-9990
	RHOR-M2571 ( RHOR-10006 RHOR-10003 RHOR-10005 )
	RHOR-7341=RHOR-9990
	RHOR-M2571=RHOR-9990
]
[ GFE-0008 , type = 1
	RHOR-3454
	RHOR-4745
	RHOR-M714 ( RHOR-7056 RHOR-9856 )
	RHOR-3454=RHOR-4745
	RHOR-M714=RHOR-4745
]
[ GFE-0009.001 , type = 3
	ASNI-798
	CAAL-3907
	CAAL-3908
	CAAL-4240
	CAGL-1584
	CRNE-265
	DEHA-2629
	ERGO-2083
	KLLA-3240
	NECR-102
	RHOR-6465
	SACE-1183
	SCPO-928
	YALI-3878
	CAAL-3907=ASNI-798
	CAAL-3907=CAAL-4240
	CAAL-3907=CAGL-1584
	CAAL-3907=CRNE-265
	CAAL-3907=DEHA-2629
	CAAL-3907=ERGO-2083
	CAAL-3907=KLLA-3240
	CAAL-3907=NECR-102
	CAAL-3907=RHOR-6465
	CAAL-3907=SACE-1183
	CAAL-3907=SCPO-928
	CAAL-3907=YALI-3878
	CAAL-3908=ASNI-798
	CAAL-3908=CAAL-4240
	CAAL-3908=CAGL-1584
	CAAL-3908=CRNE-265
	CAAL-3908=DEHA-2629
	CAAL-3908=ERGO-2083
	CAAL-3908=KLLA-3240
	CAAL-3908=NECR-102
	CAAL-3908=RHOR-6465
	CAAL-3908=SACE-1183
	CAAL-3908=SCPO-928
	CAAL-3908=YALI-3878
]
[ GFE-0009.002 , type = 2
	ASNI-1512
	CAAL-2478
	CAAL-2873
	DEHA-2933
	DEHA-3814
	KLLA-1038
	KLLA-1669
	NECR-1004
	NECR-2557
	RHOR-6736
	RHOR-8897
	YALI-2377
	YALI-5039
	CAAL-2478=ASNI-1512
	CAAL-2873=ASNI-1512
	DEHA-2933=ASNI-1512
	DEHA-3814=ASNI-1512
	KLLA-1038=ASNI-1512
	KLLA-1669=ASNI-1512
	NECR-1004=ASNI-1512
	NECR-2557=ASNI-1512
	RHOR-6736=ASNI-1512
	RHOR-8897=ASNI-1512
	YALI-2377=ASNI-1512
	YALI-5039=ASNI-1512
]
[ GFE-0009.003 , type = 1
	CAAL-3907
	CAAL-4933
	RHOR-4447
	CAAL-3907=RHOR-4447
	CAAL-4933=RHOR-4447
]
[ GFE-0009.004 , type = 2
	CAAL-2873
	CAAL-4240
	CAGL-1584
	CAGL-3070
	CRNE-265
	CRNE-4701
	DEHA-2629
	DEHA-2933
	ERGO-2083
	ERGO-526
	KLLA-1669
	KLLA-3240
	NECR-102
	NECR-2557
	RHOR-6465
	SACE-1183
	SACE-3984
	YALI-2377
	YALI-3878
	CAAL-2873=RHOR-6465
	CAAL-4240=RHOR-6465
	CAGL-1584=RHOR-6465
	CAGL-3070=RHOR-6465
	CRNE-265=RHOR-6465
	CRNE-4701=RHOR-6465
	DEHA-2629=RHOR-6465
	DEHA-2933=RHOR-6465
	ERGO-2083=RHOR-6465
	ERGO-526=RHOR-6465
	KLLA-1669=RHOR-6465
	KLLA-3240=RHOR-6465
	NECR-102=RHOR-6465
	NECR-2557=RHOR-6465
	SACE-1183=RHOR-6465
	SACE-3984=RHOR-6465
	YALI-2377=RHOR-6465
	YALI-3878=RHOR-6465
]
[ GFE-0010 , type = 1
	ASNI-2933
	NECR-9183
	NECR-M1091 ( NECR-7604 NECR-9182 )
	NECR-9183=ASNI-2933
	NECR-M1091=ASNI-2933
]
[ GFE-0011.001 , type = 1
	CAAL-2854
	CAAL-440
	CAAL-M771 ( CAAL-344 CAAL-441 )
	CAAL-2854=CAAL-440
	CAAL-M771=CAAL-440
]
[ GFE-0012 , type = 1
	RHOR-1794
	RHOR-6341
	RHOR-8448
	RHOR-1794=RHOR-8448
	RHOR-6341=RHOR-8448
]
[ GFE-0013 , type = 1
	ASNI-3079
	NECR-2191
	NECR-2194
	NECR-2191=ASNI-3079
	NECR-2194=ASNI-3079
]
[ GFE-0014 , type = 1
	CRNE-1893
	CRNE-670
	RHOR-5874
	CRNE-1893=RHOR-5874
	CRNE-670=RHOR-5874
]
[ GFE-0015 , type = 1
	CAGL-1779
	DEHA-1027
	DEHA-5133
	DEHA-1027=CAGL-1779
	DEHA-5133=CAGL-1779
]
[ GFE-0016 , type = 1
	RHOR-10195
	RHOR-M6765 ( RHOR-10205 RHOR-1804 RHOR-10204 RHOR-1414 RHOR-4445 RHOR-6796 )
	RHOR-M7020 ( RHOR-2819 RHOR-3621 RHOR-4732 RHOR-8602 )
	RHOR-M6765=RHOR-10195
	RHOR-M7020=RHOR-10195
]
[ GFE-0017 , type = 1
	RHOR-10824
	RHOR-M10972 ( RHOR-10878 RHOR-10885 RHOR-10896 RHOR-10915 RHOR-10942 RHOR-1848 RHOR-1284 RHOR-3780 RHOR-426 RHOR-4749 )
	RHOR-M11023 ( RHOR-10891 RHOR-10897 RHOR-10898 RHOR-10910 RHOR-10907 RHOR-10909 )
	RHOR-M10972=RHOR-10824
	RHOR-M11023=RHOR-10824
]
[ GFE-0018.001 , type = 3
	ASNI-2863
	ASNI-3498
	ASNI-4478
	CAAL-4190
	CAGL-1636
	CRNE-1057
	DEHA-4671
	ERGO-2506
	KLLA-2977
	NECR-758
	RHOR-2534
	SACE-1005
	SCPO-178
	YALI-2625
	ASNI-2863=ASNI-3498
	ASNI-2863=CAAL-4190
	ASNI-2863=CAGL-1636
	ASNI-2863=CRNE-1057
	ASNI-2863=DEHA-4671
	ASNI-2863=ERGO-2506
	ASNI-2863=KLLA-2977
	ASNI-2863=NECR-758
	ASNI-2863=RHOR-2534
	ASNI-2863=SACE-1005
	ASNI-2863=SCPO-178
	ASNI-2863=YALI-2625
	ASNI-4478=ASNI-3498
	ASNI-4478=CAAL-4190
	ASNI-4478=CAGL-1636
	ASNI-4478=CRNE-1057
	ASNI-4478=DEHA-4671
	ASNI-4478=ERGO-2506
	ASNI-4478=KLLA-2977
	ASNI-4478=NECR-758
	ASNI-4478=RHOR-2534
	ASNI-4478=SACE-1005
	ASNI-4478=SCPO-178
	ASNI-4478=YALI-2625
]
[ GFE-0018.002 , type = 3
	ASNI-2863
	ASNI-3498
	ASNI-4478
	ASNI-5684
	ASNI-2863=ASNI-3498
	ASNI-4478=ASNI-3498
	ASNI-5684=ASNI-3498
]
[ GFE-0018.003 , type = 3
	CRNE-1057
	DEHA-4671
	RHOR-2534
	RHOR-6204
	RHOR-9213
	SACE-1005
	RHOR-6204=CRNE-1057
	RHOR-6204=DEHA-4671
	RHOR-6204=RHOR-2534
	RHOR-6204=SACE-1005
	RHOR-9213=CRNE-1057
	RHOR-9213=DEHA-4671
	RHOR-9213=SACE-1005
	RHOR-9213=RHOR-2534
]
[ GFE-0018.004 , type = 2
	ASNI-3498
	NECR-758
	NECR-8271
	RHOR-6204
	RHOR-8556
	NECR-8271=ASNI-3498
	NECR-758=ASNI-3498
	RHOR-8556=ASNI-3498
	RHOR-6204=ASNI-3498
]
[ GFE-0019 , type = 1
	RHOR-10326
	RHOR-M4412 ( RHOR-10437 RHOR-10428 RHOR-10430 )
	RHOR-M4894 ( RHOR-6886 RHOR-9675 )
	RHOR-M4412=RHOR-10326
	RHOR-M4894=RHOR-10326
]
[ GFE-0020.001 , type = 1
	RHOR-580
	RHOR-858
	RHOR-8741
	RHOR-580=RHOR-8741
	RHOR-858=RHOR-8741
]
[ GFE-0020.002 , type = 1
	RHOR-10837
	RHOR-8741
	RHOR-M2066 ( RHOR-6033 RHOR-10498 RHOR-1375 )
	RHOR-8741=RHOR-10837
	RHOR-M2066=RHOR-10837
]
[ GFE-0021 , type = 1
	ASNI-3677
	KLLA-3458
	KLLA-M624 ( KLLA-237 KLLA-3339 )
	KLLA-3458=ASNI-3677
	KLLA-M624=ASNI-3677
]
[ GFE-0022.001 , type = 1
	RHOR-10600
	RHOR-3975
	RHOR-7117
	RHOR-3975=RHOR-10600
	RHOR-7117=RHOR-10600
]
[ GFE-0022.002 , type = 1
	RHOR-10600
	RHOR-5305
	RHOR-7117
	RHOR-5305=RHOR-7117
	RHOR-10600=RHOR-7117
]
[ GFE-0023 , type = 1
	RHOR-10294
	RHOR-M1250 ( RHOR-10291 RHOR-10297 )
	RHOR-M7429 ( RHOR-10332 RHOR-10333 )
	RHOR-M1250=RHOR-10294
	RHOR-M7429=RHOR-10294
]
[ GFE-0024.001 , type = 1
	RHOR-6267
	RHOR-8687
	RHOR-9950
	RHOR-6267=RHOR-9950
	RHOR-8687=RHOR-9950
]
[ GFE-0024.002 , type = 3
	RHOR-2154
	RHOR-6267
	RHOR-8687
	RHOR-M2484 ( RHOR-4437 RHOR-2153 RHOR-3926 )
	RHOR-6267=RHOR-2154
	RHOR-8687=RHOR-2154
	RHOR-M2484=RHOR-2154
]
[ GFE-0025 , type = 1
	RHOR-10339
	RHOR-10371
	RHOR-10412
	RHOR-10371=RHOR-10339
	RHOR-10412=RHOR-10339
]
[ GFE-0026.001 , type = 3
	CRNE-4986
	NECR-7918
	RHOR-4885
	RHOR-4886
	RHOR-4885=CRNE-4986
	RHOR-4885=NECR-7918
	RHOR-4886=CRNE-4986
	RHOR-4886=NECR-7918
]
[ GFE-0026.002 , type = 3
	NECR-7918
	RHOR-4885
	RHOR-4886
	RHOR-4887
	RHOR-4885=NECR-7918
	RHOR-4886=NECR-7918
	RHOR-4887=NECR-7918
]
[ GFE-0027 , type = 1
	RHOR-10534
	RHOR-M2513 ( RHOR-10538 RHOR-5839 )
	RHOR-M3370 ( RHOR-6656 RHOR-9198 )
	RHOR-M2513=RHOR-10534
	RHOR-M3370=RHOR-10534
]
[ GFE-0028 , type = 1
	ASNI-333
	RHOR-6007
	RHOR-M5778 ( RHOR-10297 RHOR-10299 RHOR-10305 RHOR-10308 RHOR-10312 RHOR-10318 RHOR-10334 RHOR-10294 RHOR-10296 )
	RHOR-6007=ASNI-333
	RHOR-M5778=ASNI-333
]
[ GFE-0029.001 , type = 1
	RHOR-1642
	RHOR-3412
	RHOR-3413
	RHOR-3412=RHOR-1642
	RHOR-3413=RHOR-1642
]
[ GFE-0029.002 , type = 1
	RHOR-2004
	RHOR-3413
	RHOR-839
	RHOR-3413=RHOR-2004
	RHOR-839=RHOR-2004
]
[ GFE-0030 , type = 1
	RHOR-10601
	RHOR-2548
	RHOR-M1889 ( RHOR-7394 RHOR-2423 RHOR-7117 )
	RHOR-2548=RHOR-10601
	RHOR-M1889=RHOR-10601
]
[ GFE-0031 , type = 2
	ASNI-673
	ASNI-828
	ASNI-M1474 ( ASNI-200 ASNI-7109 )
	CRNE-402
	CRNE-M2632 ( CRNE-4418 CRNE-684 )
	DEHA-3743
	DEHA-4254
	ASNI-828=ASNI-673
	ASNI-M1474=ASNI-673
	CRNE-402=ASNI-673
	CRNE-M2632=ASNI-673
	DEHA-3743=ASNI-673
	DEHA-4254=ASNI-673
]
[ GFE-0032 , type = 1
	ASNI-123
	NECR-6723
	NECR-6727
	NECR-6723=ASNI-123
	NECR-6727=ASNI-123
]
[ GFE-0033 , type = 1
	RHOR-6837
	RHOR-M3202 ( RHOR-3788 RHOR-10573 RHOR-10574 )
	RHOR-M4003 ( RHOR-9399 RHOR-10484 RHOR-5896 )
	RHOR-M3202=RHOR-6837
	RHOR-M4003=RHOR-6837
]
[ GFE-0034 , type = 3
	ASNI-3946
	CAAL-4669
	CAAL-M2438 ( CAAL-4670 CAAL-1642 CAAL-4671 )
	CRNE-962
	DEHA-1495
	SACE-5060
	CAAL-4669=ASNI-3946
	CAAL-4669=CRNE-962
	CAAL-4669=DEHA-1495
	CAAL-4669=SACE-5060
	CAAL-M2438=CRNE-962
	CAAL-M2438=SACE-5060
	CAAL-M2438=ASNI-3946
	CAAL-M2438=DEHA-1495
]
[ GFE-0035 , type = 3
	ASNI-4707
	CAAL-5071
	CAGL-1940
	CRNE-2107
	DEHA-371
	ERGO-363
	KLLA-4576
	NECR-1070
	RHOR-10493
	RHOR-4908
	RHOR-5067
	SACE-1937
	SCPO-1020
	YALI-5137
	RHOR-4908=ASNI-4707
	RHOR-4908=CAAL-5071
	RHOR-4908=CAGL-1940
	RHOR-4908=CRNE-2107
	RHOR-4908=DEHA-371
	RHOR-4908=ERGO-363
	RHOR-4908=KLLA-4576
	RHOR-4908=NECR-1070
	RHOR-4908=RHOR-10493
	RHOR-4908=SACE-1937
	RHOR-4908=SCPO-1020
	RHOR-4908=YALI-5137
	RHOR-5067=ASNI-4707
	RHOR-5067=CAAL-5071
	RHOR-5067=CAGL-1940
	RHOR-5067=CRNE-2107
	RHOR-5067=DEHA-371
	RHOR-5067=ERGO-363
	RHOR-5067=KLLA-4576
	RHOR-5067=NECR-1070
	RHOR-5067=RHOR-10493
	RHOR-5067=SACE-1937
	RHOR-5067=SCPO-1020
	RHOR-5067=YALI-5137
]
[ GFE-0036 , type = 1
	SACE-5459
	SACE-M2189 ( SACE-239 SACE-5460 )
	SACE-M855 ( SACE-1778 SACE-238 )
	SACE-M2189=SACE-5459
	SACE-M855=SACE-5459
]
[ GFE-0037 , type = 2
	ASNI-1281
	CAAL-138
	CAAL-1625
	CAGL-3174
	CAGL-3481
	DEHA-1759
	DEHA-4528
	SCPO-1058
	SCPO-1244
	CAAL-138=ASNI-1281
	CAAL-1625=ASNI-1281
	CAGL-3174=ASNI-1281
	CAGL-3481=ASNI-1281
	DEHA-1759=ASNI-1281
	DEHA-4528=ASNI-1281
	SCPO-1058=ASNI-1281
	SCPO-1244=ASNI-1281
]
[ GFE-0038 , type = 1
	NECR-7801
	RHOR-M120 ( RHOR-10189 RHOR-6847 )
	RHOR-M1668 ( RHOR-6749 RHOR-8590 )
	RHOR-M120=NECR-7801
	RHOR-M1668=NECR-7801
]
[ GFE-0039 , type = 1
	RHOR-10349
	RHOR-2607
	RHOR-M1693 ( RHOR-10423 RHOR-10376 RHOR-10411 )
	RHOR-2607=RHOR-10349
	RHOR-M1693=RHOR-10349
]
[ GFE-0040.001 , type = 1
	CAGL-1862
	CAGL-3511
	RHOR-7721
	CAGL-1862=RHOR-7721
	CAGL-3511=RHOR-7721
]
[ GFE-0040.002 , type = 2
	CAGL-3511
	CAGL-M1129 ( CAGL-11 CAGL-4307 )
	KLLA-4022
	KLLA-M2389 ( KLLA-1252 KLLA-4589 )
	SCPO-1104
	CAGL-3511=SCPO-1104
	CAGL-M1129=SCPO-1104
	KLLA-4022=SCPO-1104
	KLLA-M2389=SCPO-1104
]
[ GFE-0041 , type = 1
	ASNI-5157
	NECR-8157
	NECR-8168
	NECR-8157=ASNI-5157
	NECR-8168=ASNI-5157
]
[ GFE-0042 , type = 3
	ASNI-6204
	ASNI-M1374 ( ASNI-2063 ASNI-6203 ASNI-7267 )
	CAAL-791
	CAGL-2318
	CRNE-2086
	DEHA-2366
	ERGO-1707
	KLLA-3718
	NECR-1130
	SACE-891
	YALI-746
	ASNI-M1374=CAGL-2318
	ASNI-M1374=CRNE-2086
	ASNI-M1374=DEHA-2366
	ASNI-M1374=ERGO-1707
	ASNI-M1374=KLLA-3718
	ASNI-M1374=NECR-1130
	ASNI-M1374=SACE-891
	ASNI-6204=CAAL-791
	ASNI-6204=CAGL-2318
	ASNI-6204=CRNE-2086
	ASNI-6204=DEHA-2366
	ASNI-6204=ERGO-1707
	ASNI-6204=KLLA-3718
	ASNI-6204=NECR-1130
	ASNI-6204=SACE-891
	ASNI-6204=YALI-746
	ASNI-M1374=YALI-746
	ASNI-M1374=CAAL-791
]
[ GFE-0043.001 , type = 2
	ASNI-291
	ASNI-M539 ( ASNI-7326 ASNI-7330 )
	CAGL-2888
	CAGL-M1969 ( CAGL-4371 CAGL-4372 )
	RHOR-2379
	RHOR-M3912 ( RHOR-2545 RHOR-6838 )
	RHOR-M5351 ( RHOR-1767 RHOR-9912 RHOR-9914 RHOR-9918 )
	ASNI-291=RHOR-2379
	ASNI-M539=RHOR-2379
	CAGL-2888=RHOR-2379
	CAGL-M1969=RHOR-2379
	RHOR-M3912=RHOR-2379
	RHOR-M5351=RHOR-2379
]
[ GFE-0043.002 , type = 2
	ASNI-1422
	ASNI-291
	CRNE-3335
	CRNE-4665
	ERGO-1208
	ERGO-772
	NECR-7436
	NECR-M405 ( NECR-2175 NECR-7994 )
	RHOR-9961
	RHOR-9965
	RHOR-M3885 ( RHOR-9963 RHOR-5688 RHOR-9748 )
	SACE-183
	SACE-M4441 ( SACE-3580 SACE-904 )
	ASNI-1422=RHOR-9961
	ASNI-291=RHOR-9961
	CRNE-3335=RHOR-9961
	CRNE-4665=RHOR-9961
	ERGO-1208=RHOR-9961
	ERGO-772=RHOR-9961
	NECR-7436=RHOR-9961
	NECR-M405=RHOR-9961
	RHOR-9965=RHOR-9961
	RHOR-M3885=RHOR-9961
	SACE-183=RHOR-9961
	SACE-M4441=RHOR-9961
]
[ GFE-0044.001 , type = 1
	RHOR-1726
	RHOR-9907
	RHOR-9909
	RHOR-9907=RHOR-1726
	RHOR-9909=RHOR-1726
]
[ GFE-0044.002 , type = 1
	RHOR-9906
	RHOR-9907
	RHOR-9909
	RHOR-9907=RHOR-9906
	RHOR-9909=RHOR-9906
]
[ GFE-0045 , type = 3
	CAAL-2352
	CAAL-2353
	CAGL-2787
	DEHA-3056
	ERGO-1142
	RHOR-5072
	SCPO-2936
	CAAL-2352=CAGL-2787
	CAAL-2352=DEHA-3056
	CAAL-2352=ERGO-1142
	CAAL-2352=RHOR-5072
	CAAL-2352=SCPO-2936
	CAAL-2353=CAGL-2787
	CAAL-2353=DEHA-3056
	CAAL-2353=ERGO-1142
	CAAL-2353=RHOR-5072
	CAAL-2353=SCPO-2936
]
[ GFE-0046.001 , type = 2
	ASNI-36
	CAAL-290
	CAAL-4800
	CAGL-1422
	CAGL-2573
	ERGO-1059
	ERGO-1710
	KLLA-1817
	KLLA-3046
	NECR-260
	NECR-261
	RHOR-2678
	RHOR-M3230 ( RHOR-2692 RHOR-9989 )
	SACE-2798
	SACE-845
	SCPO-1491
	SCPO-1790
	YALI-709
	YALI-735
	CAAL-4800=ASNI-36
	CAAL-290=ASNI-36
	CAGL-1422=ASNI-36
	CAGL-2573=ASNI-36
	ERGO-1059=ASNI-36
	ERGO-1710=ASNI-36
	KLLA-1817=ASNI-36
	KLLA-3046=ASNI-36
	NECR-260=ASNI-36
	NECR-261=ASNI-36
	RHOR-2678=ASNI-36
	RHOR-M3230=ASNI-36
	SACE-2798=ASNI-36
	SACE-845=ASNI-36
	SCPO-1491=ASNI-36
	SCPO-1790=ASNI-36
	YALI-709=ASNI-36
	YALI-735=ASNI-36
]
[ GFE-0046.002 , type = 2
	ASNI-36
	ASNI-999
	CRNE-1628
	CRNE-1909
	RHOR-2678
	SCPO-1790
	SCPO-21
	ASNI-36=RHOR-2678
	ASNI-999=RHOR-2678
	CRNE-1628=RHOR-2678
	CRNE-1909=RHOR-2678
	SCPO-1790=RHOR-2678
	SCPO-21=RHOR-2678
]
[ GFE-0046.003 , type = 3
	CAAL-290
	CAGL-1422
	CRNE-2898
	CRNE-5278
	ERGO-1710
	KLLA-1817
	SACE-845
	SCPO-1491
	CRNE-2898=CAAL-290
	CRNE-2898=CAGL-1422
	CRNE-2898=ERGO-1710
	CRNE-2898=KLLA-1817
	CRNE-2898=SACE-845
	CRNE-2898=SCPO-1491
	CRNE-5278=CAAL-290
	CRNE-5278=CAGL-1422
	CRNE-5278=ERGO-1710
	CRNE-5278=KLLA-1817
	CRNE-5278=SACE-845
	CRNE-5278=SCPO-1491
]
[ GFE-0047 , type = 1
	RHOR-10648
	RHOR-6233
	RHOR-M346 ( RHOR-10653 RHOR-3457 )
	RHOR-6233=RHOR-10648
	RHOR-M346=RHOR-10648
]
[ GFE-0048 , type = 1
	ASNI-2243
	NECR-5034
	NECR-M778 ( NECR-9297 NECR-9298 )
	NECR-5034=ASNI-2243
	NECR-M778=ASNI-2243
]
[ GFE-0049 , type = 1
	RHOR-442
	RHOR-4747
	RHOR-M516 ( RHOR-10834 RHOR-10952 )
	RHOR-4747=RHOR-442
	RHOR-M516=RHOR-442
]
[ GFE-0050.001 , type = 4
	ASNI-5856
	CAAL-2759
	CAAL-2760
	CRNE-4976
	DEHA-3339
	DEHA-3340
	KLLA-673
	NECR-2763
	RHOR-180
	RHOR-7941
	YALI-2533
	YALI-2534
	CAAL-2759=ASNI-5856
	CAAL-2759=CRNE-4976
	CAAL-2759=KLLA-673
	CAAL-2759=NECR-2763
	CAAL-2760=ASNI-5856
	CAAL-2760=CRNE-4976
	CAAL-2760=KLLA-673
	CAAL-2760=NECR-2763
	DEHA-3339=ASNI-5856
	DEHA-3339=CRNE-4976
	DEHA-3339=KLLA-673
	DEHA-3339=NECR-2763
	DEHA-3340=ASNI-5856
	DEHA-3340=CRNE-4976
	DEHA-3340=KLLA-673
	DEHA-3340=NECR-2763
	RHOR-180=ASNI-5856
	RHOR-180=CRNE-4976
	RHOR-180=KLLA-673
	RHOR-180=NECR-2763
	RHOR-7941=ASNI-5856
	RHOR-7941=CRNE-4976
	RHOR-7941=KLLA-673
	RHOR-7941=NECR-2763
	YALI-2533=ASNI-5856
	YALI-2533=CRNE-4976
	YALI-2533=KLLA-673
	YALI-2533=NECR-2763
	YALI-2534=ASNI-5856
	YALI-2534=CRNE-4976
	YALI-2534=KLLA-673
	YALI-2534=NECR-2763
]
[ GFE-0050.002 , type = 2
	CAAL-2759
	CAAL-2760
	DEHA-3339
	DEHA-3340
	SCPO-1812
	YALI-2533
	YALI-2534
	CAAL-2759=SCPO-1812
	CAAL-2760=SCPO-1812
	DEHA-3339=SCPO-1812
	DEHA-3340=SCPO-1812
	YALI-2533=SCPO-1812
	YALI-2534=SCPO-1812
]
[ GFE-0051 , type = 1
	RHOR-1007
	RHOR-9577
	RHOR-9578
	RHOR-9577=RHOR-1007
	RHOR-9578=RHOR-1007
]
[ GFE-0052 , type = 1
	ASNI-918
	ASNI-M43 ( ASNI-2019 ASNI-5395 )
	CRNE-5517
	ASNI-918=CRNE-5517
	ASNI-M43=CRNE-5517
]
[ GFE-0053.001 , type = 2
	ASNI-2211
	ASNI-5474
	CAGL-2553
	CAGL-3054
	CRNE-4458
	CRNE-M453 ( CRNE-382 CRNE-4884 )
	ERGO-1388
	ERGO-624
	RHOR-10665
	RHOR-2469
	RHOR-7578
	SCPO-614
	SCPO-860
	ASNI-2211=RHOR-7578
	ASNI-5474=RHOR-7578
	CAGL-2553=RHOR-7578
	CAGL-3054=RHOR-7578
	CRNE-4458=RHOR-7578
	CRNE-M453=RHOR-7578
	ERGO-1388=RHOR-7578
	ERGO-624=RHOR-7578
	RHOR-10665=RHOR-7578
	RHOR-2469=RHOR-7578
	SCPO-614=RHOR-7578
	SCPO-860=RHOR-7578
]
[ GFE-0053.002 , type = 1
	RHOR-10590
	RHOR-10665
	RHOR-8115
	RHOR-10590=RHOR-8115
	RHOR-10665=RHOR-8115
]
[ GFE-0054 , type = 1
	ASNI-5406
	ASNI-7088
	ASNI-M3209 ( ASNI-4298 ASNI-7092 ASNI-1 ASNI-2 )
	ASNI-7088=ASNI-5406
	ASNI-M3209=ASNI-5406
]
[ GFE-0055.001 , type = 2
	ASNI-2533
	ASNI-M1175 ( ASNI-5622 ASNI-7216 )
	CAAL-3046
	CAAL-626
	NECR-3454
	NECR-6522
	RHOR-1928
	RHOR-8704
	RHOR-9938
	YALI-3866
	YALI-5161
	ASNI-2533=RHOR-1928
	ASNI-M1175=RHOR-1928
	CAAL-3046=RHOR-1928
	CAAL-626=RHOR-1928
	NECR-3454=RHOR-1928
	NECR-6522=RHOR-1928
	RHOR-8704=RHOR-1928
	RHOR-9938=RHOR-1928
	YALI-3866=RHOR-1928
	YALI-5161=RHOR-1928
]
[ GFE-0055.002 , type = 2
	CAAL-3046
	CAAL-626
	ERGO-2137
	YALI-3866
	YALI-5161
	CAAL-3046=ERGO-2137
	CAAL-626=ERGO-2137
	YALI-3866=ERGO-2137
	YALI-5161=ERGO-2137
]
[ GFE-0055.003 , type = 2
	CRNE-4743
	CRNE-5491
	NECR-2358
	RHOR-8704
	RHOR-9938
	YALI-3866
	YALI-5161
	CRNE-4743=NECR-2358
	CRNE-5491=NECR-2358
	RHOR-8704=NECR-2358
	RHOR-9938=NECR-2358
	YALI-3866=NECR-2358
	YALI-5161=NECR-2358
]
[ GFE-0055.004 , type = 2
	KLLA-4588
	RHOR-1928
	RHOR-8383
	SACE-2719
	SACE-2720
	RHOR-1928=KLLA-4588
	RHOR-8383=KLLA-4588
	SACE-2719=KLLA-4588
	SACE-2720=KLLA-4588
]
[ GFE-0055.005 , type = 4
	CAAL-3323
	CRNE-5491
	DEHA-83
	ERGO-3470
	RHOR-8383
	RHOR-9938
	SACE-2719
	SACE-2720
	RHOR-8383=CAAL-3323
	RHOR-8383=CRNE-5491
	RHOR-8383=DEHA-83
	RHOR-8383=ERGO-3470
	RHOR-9938=CAAL-3323
	RHOR-9938=DEHA-83
	RHOR-9938=ERGO-3470
	RHOR-9938=CRNE-5491
	SACE-2719=CAAL-3323
	SACE-2719=CRNE-5491
	SACE-2719=DEHA-83
	SACE-2719=ERGO-3470
	SACE-2720=CAAL-3323
	SACE-2720=CRNE-5491
	SACE-2720=DEHA-83
	SACE-2720=ERGO-3470
]
[ GFE-0055.006 , type = 3
	ASNI-2226
	CAGL-2358
	CRNE-4674
	DEHA-3383
	NECR-3429
	RHOR-2192
	SACE-2719
	SACE-2720
	SACE-611
	YALI-5161
	SACE-2719=ASNI-2226
	SACE-2719=CAGL-2358
	SACE-2719=CRNE-4674
	SACE-2719=DEHA-3383
	SACE-2719=NECR-3429
	SACE-2719=RHOR-2192
	SACE-2719=SACE-611
	SACE-2719=YALI-5161
	SACE-2720=ASNI-2226
	SACE-2720=CAGL-2358
	SACE-2720=CRNE-4674
	SACE-2720=DEHA-3383
	SACE-2720=NECR-3429
	SACE-2720=RHOR-2192
	SACE-2720=SACE-611
	SACE-2720=YALI-5161
]
[ GFE-0055.007 , type = 2
	ASNI-2326
	SCPO-1903
	SCPO-3198
	YALI-2717
	YALI-5161
	SCPO-1903=ASNI-2326
	SCPO-3198=ASNI-2326
	YALI-2717=ASNI-2326
	YALI-5161=ASNI-2326
]
[ GFE-0055.008 , type = 1
	YALI-1171
	YALI-3866
	YALI-5161
	YALI-3866=YALI-1171
	YALI-5161=YALI-1171
]
[ GFE-0056 , type = 1
	RHOR-10791
	RHOR-1738
	RHOR-M901 ( RHOR-1368 RHOR-3514 )
	RHOR-1738=RHOR-10791
	RHOR-M901=RHOR-10791
]
[ GFE-0057 , type = 1
	ASNI-3932
	RHOR-7960
	RHOR-M1403 ( RHOR-10214 RHOR-10220 )
	RHOR-7960=ASNI-3932
	RHOR-M1403=ASNI-3932
]
[ GFE-0058 , type = 1
	RHOR-10315
	RHOR-M3749 ( RHOR-9612 RHOR-10764 RHOR-6480 )
	RHOR-M4331 ( RHOR-10310 RHOR-10352 RHOR-10365 RHOR-10427 )
	RHOR-M3749=RHOR-10315
	RHOR-M4331=RHOR-10315
]
[ GFE-0059 , type = 1
	ASNI-1041
	ASNI-3793
	ASNI-M2491 ( ASNI-7384 ASNI-6431 ASNI-7180 )
	ASNI-3793=ASNI-1041
	ASNI-M2491=ASNI-1041
]
[ GFE-0060 , type = 3
	CAAL-3108
	CAAL-3109
	CAGL-2973
	CRNE-3403
	DEHA-4069
	KLLA-1085
	NECR-913
	RHOR-4186
	SCPO-3626
	YALI-3689
	CAAL-3108=CAGL-2973
	CAAL-3108=CRNE-3403
	CAAL-3108=DEHA-4069
	CAAL-3108=KLLA-1085
	CAAL-3108=NECR-913
	CAAL-3108=RHOR-4186
	CAAL-3108=SCPO-3626
	CAAL-3108=YALI-3689
	CAAL-3109=CAGL-2973
	CAAL-3109=CRNE-3403
	CAAL-3109=DEHA-4069
	CAAL-3109=KLLA-1085
	CAAL-3109=NECR-913
	CAAL-3109=RHOR-4186
	CAAL-3109=SCPO-3626
	CAAL-3109=YALI-3689
]
[ GFE-0061 , type = 1
	CRNE-5091
	RHOR-M2318 ( RHOR-4735 RHOR-5823 )
	RHOR-M3229 ( RHOR-9796 RHOR-2422 RHOR-4734 )
	RHOR-M2318=CRNE-5091
	RHOR-M3229=CRNE-5091
]
[ GFE-0062 , type = 1
	RHOR-10794
	RHOR-881
	RHOR-M3073 ( RHOR-1749 RHOR-882 RHOR-10802 RHOR-10804 )
	RHOR-881=RHOR-10794
	RHOR-M3073=RHOR-10794
]
[ GFE-0063.001 , type = 3
	ASNI-3967
	CAAL-2420
	CAAL-4271
	CAAL-4272
	CRNE-275
	NECR-9151
	SACE-2920
	SCPO-1580
	YALI-4641
	CAAL-4271=ASNI-3967
	CAAL-4271=CAAL-2420
	CAAL-4271=CRNE-275
	CAAL-4271=NECR-9151
	CAAL-4271=SCPO-1580
	CAAL-4271=YALI-4641
	CAAL-4272=ASNI-3967
	CAAL-4272=CAAL-2420
	CAAL-4272=CRNE-275
	CAAL-4272=NECR-9151
	CAAL-4272=SACE-2920
	CAAL-4272=SCPO-1580
	CAAL-4272=YALI-4641
	CAAL-4271=SACE-2920
]
[ GFE-0063.002 , type = 3
	CAAL-1987
	CAAL-4272
	CAGL-396
	KLLA-281
	CAAL-1987=CAGL-396
	CAAL-1987=KLLA-281
	CAAL-4272=CAGL-396
	CAAL-4272=KLLA-281
]
[ GFE-0064 , type = 2
	ASNI-5886
	ASNI-7508
	ASNI-M3708 ( ASNI-7565 ASNI-7566 ASNI-7583 ASNI-7554 ASNI-7559 )
	NECR-52
	NECR-M4792 ( NECR-9269 NECR-9267 NECR-9268 )
	SCPO-1522
	SCPO-M5221 ( SCPO-4001 SCPO-8 )
	ASNI-7508=ASNI-5886
	ASNI-M3708=ASNI-5886
	NECR-52=ASNI-5886
	NECR-M4792=ASNI-5886
	SCPO-1522=ASNI-5886
	SCPO-M5221=ASNI-5886
]
[ GFE-0065 , type = 1
	RHOR-5122
	RHOR-6286
	RHOR-M753 ( RHOR-2394 RHOR-9974 )
	RHOR-6286=RHOR-5122
	RHOR-M753=RHOR-5122
]
[ GFE-0066 , type = 1
	RHOR-2799
	RHOR-M8488 ( RHOR-1132 RHOR-2788 RHOR-3877 RHOR-5019 )
	RHOR-M8757 ( RHOR-9568 RHOR-10023 RHOR-10025 RHOR-10117 RHOR-1429 RHOR-1586 RHOR-10019 RHOR-10020 )
	RHOR-M8488=RHOR-2799
	RHOR-M8757=RHOR-2799
]
[ GFE-0067 , type = 3
	ASNI-4087
	CRNE-129
	CRNE-3991
	YALI-1764
	CRNE-129=ASNI-4087
	CRNE-129=YALI-1764
	CRNE-3991=ASNI-4087
	CRNE-3991=YALI-1764
]
[ GFE-0068 , type = 1
	CAAL-547
	CAAL-79
	DEHA-4984
	CAAL-547=DEHA-4984
	CAAL-79=DEHA-4984
]
[ GFE-0069.001 , type = 1
	CAAL-351
	CAAL-4367
	DEHA-958
	CAAL-351=DEHA-958
	CAAL-4367=DEHA-958
]
[ GFE-0069.002 , type = 2
	ASNI-46
	CAAL-2054
	CAAL-351
	CAGL-4344
	CAGL-690
	CRNE-714
	CRNE-868
	ERGO-2378
	ERGO-4117
	KLLA-4543
	KLLA-725
	RHOR-4817
	RHOR-947
	SACE-3631
	SACE-M4891 ( SACE-5426 SACE-5427 )
	SCPO-2836
	SCPO-M3839 ( SCPO-3111 SCPO-4127 )
	YALI-5135
	YALI-984
	CAAL-2054=ASNI-46
	CAAL-351=ASNI-46
	CAGL-690=ASNI-46
	CAGL-4344=ASNI-46
	CRNE-714=ASNI-46
	CRNE-868=ASNI-46
	ERGO-2378=ASNI-46
	ERGO-4117=ASNI-46
	KLLA-4543=ASNI-46
	KLLA-725=ASNI-46
	RHOR-4817=ASNI-46
	RHOR-947=ASNI-46
	SACE-3631=ASNI-46
	SACE-M4891=ASNI-46
	SCPO-2836=ASNI-46
	SCPO-M3839=ASNI-46
	YALI-5135=ASNI-46
	YALI-984=ASNI-46
]
[ GFE-0069.003 , type = 2
	ASNI-751
	CAAL-2088
	CAAL-351
	CAGL-2314
	CAGL-4344
	CRNE-2623
	CRNE-3998
	DEHA-1576
	DEHA-5131
	ERGO-1938
	ERGO-4117
	KLLA-3406
	KLLA-4543
	NECR-1962
	NECR-5249
	RHOR-5051
	RHOR-947
	SACE-3647
	SACE-850
	SCPO-3335
	SCPO-4110
	YALI-1912
	YALI-5135
	CAAL-351=ASNI-751
	CAAL-2088=ASNI-751
	CAGL-4344=ASNI-751
	CAGL-2314=ASNI-751
	CRNE-2623=ASNI-751
	CRNE-3998=ASNI-751
	DEHA-1576=ASNI-751
	DEHA-5131=ASNI-751
	ERGO-1938=ASNI-751
	ERGO-4117=ASNI-751
	KLLA-4543=ASNI-751
	KLLA-3406=ASNI-751
	NECR-1962=ASNI-751
	NECR-5249=ASNI-751
	RHOR-5051=ASNI-751
	RHOR-947=ASNI-751
	SACE-3647=ASNI-751
	SACE-850=ASNI-751
	SCPO-4110=ASNI-751
	SCPO-3335=ASNI-751
	YALI-1912=ASNI-751
	YALI-5135=ASNI-751
]
[ GFE-0069.004 , type = 1
	CAAL-1841
	CAAL-1842
	DEHA-2646
	CAAL-1841=DEHA-2646
	CAAL-1842=DEHA-2646
]
[ GFE-0070 , type = 2
	ASNI-4088
	CRNE-2081
	CRNE-5054
	NECR-3556
	NECR-4308
	CRNE-2081=ASNI-4088
	CRNE-5054=ASNI-4088
	NECR-3556=ASNI-4088
	NECR-4308=ASNI-4088
]
[ GFE-0071.001 , type = 1
	RHOR-10647
	RHOR-10656
	RHOR-M1492 ( RHOR-10657 RHOR-7467 )
	RHOR-10656=RHOR-10647
	RHOR-M1492=RHOR-10647
]
[ GFE-0071.002 , type = 1
	RHOR-10651
	RHOR-10656
	RHOR-M661 ( RHOR-10657 RHOR-7467 )
	RHOR-10656=RHOR-10651
	RHOR-M661=RHOR-10651
]
[ GFE-0071.003 , type = 1
	RHOR-10654
	RHOR-10656
	RHOR-M1067 ( RHOR-10657 RHOR-7467 )
	RHOR-10656=RHOR-10654
	RHOR-M1067=RHOR-10654
]
[ GFE-0072.001 , type = 1
	RHOR-4726
	RHOR-5326
	RHOR-M3126 ( RHOR-7211 RHOR-10513 RHOR-10511 RHOR-10512 )
	RHOR-5326=RHOR-4726
	RHOR-M3126=RHOR-4726
]
[ GFE-0072.002 , type = 1
	RHOR-5326
	RHOR-7791
	RHOR-9168
	RHOR-5326=RHOR-9168
	RHOR-7791=RHOR-9168
]
[ GFE-0073 , type = 1
	RHOR-10789
	RHOR-M6584 ( RHOR-8736 RHOR-1100 RHOR-4026 )
	RHOR-M7559 ( RHOR-916 RHOR-1368 RHOR-1738 RHOR-5608 RHOR-6559 RHOR-6560 RHOR-8840 )
	RHOR-M6584=RHOR-10789
	RHOR-M7559=RHOR-10789
]
[ GFE-0074 , type = 1
	RHOR-10669
	RHOR-6168
	RHOR-M2624 ( RHOR-7272 RHOR-1016 RHOR-1403 )
	RHOR-6168=RHOR-10669
	RHOR-M2624=RHOR-10669
]
[ GFE-0075 , type = 1
	ASNI-6103
	ASNI-7120
	ASNI-M3296 ( ASNI-7428 ASNI-6172 ASNI-2397 ASNI-3586 )
	ASNI-6103=ASNI-7120
	ASNI-M3296=ASNI-7120
]
[ GFE-0076 , type = 1
	RHOR-6048
	RHOR-6743
	RHOR-6744
	RHOR-6743=RHOR-6048
	RHOR-6744=RHOR-6048
]
[ GFE-0077 , type = 2
	ERGO-2646
	ERGO-M1375 ( ERGO-3345 ERGO-902 )
	RHOR-2960
	RHOR-8857
	RHOR-9344
	ERGO-2646=RHOR-8857
	ERGO-M1375=RHOR-8857
	RHOR-2960=RHOR-8857
	RHOR-9344=RHOR-8857
]
[ GFE-0078.001 , type = 2
	ASNI-772
	ASNI-7251
	CAAL-266
	CAAL-3881
	CAGL-102
	CAGL-M5396 ( CAGL-1176 CAGL-4360 )
	CRNE-1416
	CRNE-5439
	DEHA-1104
	DEHA-608
	ERGO-377
	ERGO-975
	KLLA-1107
	KLLA-1415
	NECR-147
	NECR-7577
	NECR-M458 ( NECR-1156 NECR-9209 )
	RHOR-3568
	RHOR-M7808 ( RHOR-740 RHOR-9771 )
	SACE-1613
	SACE-392
	SCPO-1296
	SCPO-M7616 ( SCPO-328 SCPO-4019 )
	YALI-1312
	YALI-5124
	ASNI-772=NECR-7577
	ASNI-7251=NECR-7577
	CAAL-3881=NECR-7577
	CAAL-266=NECR-7577
	CAGL-102=NECR-7577
	CAGL-M5396=NECR-7577
	CRNE-1416=NECR-7577
	CRNE-5439=NECR-7577
	DEHA-1104=NECR-7577
	DEHA-608=NECR-7577
	ERGO-377=NECR-7577
	ERGO-975=NECR-7577
	KLLA-1415=NECR-7577
	KLLA-1107=NECR-7577
	NECR-147=NECR-7577
	NECR-M458=NECR-7577
	RHOR-3568=NECR-7577
	RHOR-M7808=NECR-7577
	SACE-1613=NECR-7577
	SACE-392=NECR-7577
	SCPO-1296=NECR-7577
	SCPO-M7616=NECR-7577
	YALI-1312=NECR-7577
	YALI-5124=NECR-7577
]
[ GFE-0078.002 , type = 2
	ASNI-3393
	CRNE-1320
	CRNE-5439
	DEHA-4079
	DEHA-608
	NECR-9221
	NECR-M458 ( NECR-1156 NECR-9209 )
	CRNE-1320=ASNI-3393
	CRNE-5439=ASNI-3393
	DEHA-4079=ASNI-3393
	DEHA-608=ASNI-3393
	NECR-9221=ASNI-3393
	NECR-M458=ASNI-3393
]
[ GFE-0078.003 , type = 2
	ASNI-7549
	ASNI-7251
	ASNI-M8501 ( ASNI-310 ASNI-4320 ASNI-4495 ASNI-4907 ASNI-5370 ASNI-5413 ASNI-5607 ASNI-6442 ASNI-7551 ASNI-7553 ASNI-7558 ASNI-7571 ASNI-7573 ASNI-7579 ASNI-7617 ASNI-1202 ASNI-1696 )
	CAAL-266
	CAAL-M9915 ( CAAL-5114 CAAL-1050 CAAL-5110 CAAL-992 CAAL-5111 CAAL-5113 )
	CAGL-102
	CAGL-M8769 ( CAGL-4309 CAGL-26 CAGL-2867 )
	CRNE-5439
	CRNE-M10039 ( CRNE-5499 CRNE-5213 CRNE-5493 )
	DEHA-608
	DEHA-M9520 ( DEHA-2491 DEHA-5208 )
	ERGO-377
	ERGO-M10095 ( ERGO-1785 ERGO-4165 )
	KLLA-1107
	KLLA-M10302 ( KLLA-4642 KLLA-4644 KLLA-4645 KLLA-3215 KLLA-4641 )
	NECR-M458 ( NECR-1156 NECR-9209 )
	NECR-M9426 ( NECR-9336 NECR-9337 NECR-4335 NECR-9332 NECR-9333 NECR-9335 )
	RHOR-M10571 ( RHOR-740 RHOR-9770 )
	RHOR-M10650 ( RHOR-10216 RHOR-7586 RHOR-8161 RHOR-10212 RHOR-10213 )
	SACE-392
	SACE-M10758 ( SACE-5391 SACE-5392 SACE-5393 SACE-900 )
	SCPO-M10351 ( SCPO-308 SCPO-4016 )
	SCPO-M7616 ( SCPO-328 SCPO-4019 )
	YALI-5124
	YALI-M2578 ( YALI-5121 YALI-415 YALI-5120 )
	ASNI-7251=ASNI-7549
	ASNI-M8501=ASNI-7549
	CAAL-266=ASNI-7549
	CAAL-M9915=ASNI-7549
	CAGL-102=ASNI-7549
	CAGL-M8769=ASNI-7549
	CRNE-5439=ASNI-7549
	CRNE-M10039=ASNI-7549
	DEHA-608=ASNI-7549
	DEHA-M9520=ASNI-7549
	ERGO-377=ASNI-7549
	ERGO-M10095=ASNI-7549
	KLLA-1107=ASNI-7549
	KLLA-M10302=ASNI-7549
	NECR-M458=ASNI-7549
	NECR-M9426=ASNI-7549
	RHOR-M10571=ASNI-7549
	RHOR-M10650=ASNI-7549
	SACE-392=ASNI-7549
	SACE-M10758=ASNI-7549
	SCPO-M10351=ASNI-7549
	SCPO-M7616=ASNI-7549
	YALI-5124=ASNI-7549
	YALI-M2578=ASNI-7549
]
[ GFE-0078.004 , type = 1
	RHOR-104
	SCPO-1296
	SCPO-187
	SCPO-1296=RHOR-104
	SCPO-187=RHOR-104
]
[ GFE-0078.005 , type = 1
	CAGL-102
	KLLA-728
	KLLA-729
	KLLA-728=CAGL-102
	KLLA-729=CAGL-102
]
[ GFE-0079.001 , type = 1
	ASNI-2637
	ASNI-753
	ASNI-M2822 ( ASNI-7310 ASNI-989 ASNI-7308 ASNI-7309 )
	ASNI-2637=ASNI-753
	ASNI-M2822=ASNI-753
]
[ GFE-0079.002 , type = 3
	ASNI-2637
	ASNI-5334
	ASNI-6718
	ASNI-753
	ASNI-5334=ASNI-2637
	ASNI-6718=ASNI-2637
	ASNI-753=ASNI-2637
]
[ GFE-0079.003 , type = 1
	ASNI-2637
	NECR-128
	NECR-8199
	NECR-128=ASNI-2637
	NECR-8199=ASNI-2637
]
[ GFE-0080 , type = 1
	ASNI-3579
	ASNI-776
	RHOR-9435
	ASNI-3579=RHOR-9435
	ASNI-776=RHOR-9435
]
[ GFE-0081 , type = 1
	RHOR-10715
	RHOR-M7539 ( RHOR-6627 RHOR-6900 )
	RHOR-M8569 ( RHOR-9167 RHOR-9674 RHOR-4723 RHOR-10755 RHOR-10756 RHOR-5731 RHOR-6068 )
	RHOR-M7539=RHOR-10715
	RHOR-M8569=RHOR-10715
]
[ GFE-0082 , type = 1
	KLLA-4310
	KLLA-4311
	SACE-1267
	KLLA-4310=SACE-1267
	KLLA-4311=SACE-1267
]
[ GFE-0083 , type = 2
	ASNI-2920
	ASNI-3180
	ASNI-3987
	CAAL-2914
	CAAL-4572
	SACE-546
	SACE-549
	ASNI-3180=ASNI-2920
	ASNI-3987=ASNI-2920
	CAAL-2914=ASNI-2920
	CAAL-4572=ASNI-2920
	SACE-546=ASNI-2920
	SACE-549=ASNI-2920
]
[ GFE-0084.001 , type = 3
	ASNI-4031
	CAAL-3009
	CAGL-598
	DEHA-437
	KLLA-2563
	KLLA-2564
	SCPO-3281
	YALI-4885
	KLLA-2563=ASNI-4031
	KLLA-2563=CAAL-3009
	KLLA-2563=CAGL-598
	KLLA-2563=DEHA-437
	KLLA-2563=SCPO-3281
	KLLA-2563=YALI-4885
	KLLA-2564=ASNI-4031
	KLLA-2564=CAAL-3009
	KLLA-2564=CAGL-598
	KLLA-2564=DEHA-437
	KLLA-2564=SCPO-3281
	KLLA-2564=YALI-4885
]
[ GFE-0084.002 , type = 1
	KLLA-2095
	KLLA-2564
	SACE-930
	KLLA-2095=SACE-930
	KLLA-2564=SACE-930
]
[ GFE-0084.003 , type = 1
	ERGO-412
	KLLA-1419
	KLLA-2564
	KLLA-1419=ERGO-412
	KLLA-2564=ERGO-412
]
[ GFE-0085 , type = 1
	RHOR-7397
	RHOR-M5413 ( RHOR-5993 RHOR-9673 )
	RHOR-M6391 ( RHOR-7688 RHOR-10577 RHOR-10578 RHOR-10631 RHOR-10632 RHOR-10639 RHOR-10640 )
	RHOR-M5413=RHOR-7397
	RHOR-M6391=RHOR-7397
]
[ GFE-0086 , type = 1
	RHOR-9850
	RHOR-M5155 ( RHOR-9856 RHOR-230 RHOR-6901 RHOR-4935 RHOR-9851 RHOR-7056 RHOR-9852 )
	RHOR-M522 ( RHOR-1726 RHOR-9906 )
	RHOR-M5155=RHOR-9850
	RHOR-M522=RHOR-9850
]
[ GFE-0087 , type = 1
	RHOR-1379
	RHOR-1629
	RHOR-3481
	RHOR-1629=RHOR-1379
	RHOR-3481=RHOR-1379
]
[ GFE-0088 , type = 1
	DEHA-1209
	DEHA-1210
	DEHA-4268
	DEHA-1209=DEHA-4268
	DEHA-1210=DEHA-4268
]
[ GFE-0089 , type = 1
	YALI-19
	YALI-223
	YALI-4
	YALI-19=YALI-4
	YALI-223=YALI-4
]
[ GFE-0090 , type = 3
	ASNI-5789
	DEHA-1852
	NECR-421
	SACE-2717
	SACE-2718
	SACE-2717=ASNI-5789
	SACE-2717=DEHA-1852
	SACE-2717=NECR-421
	SACE-2718=ASNI-5789
	SACE-2718=DEHA-1852
	SACE-2718=NECR-421
]
[ GFE-0091.001 , type = 1
	CAAL-1686
	RHOR-4323
	RHOR-M42 ( RHOR-10170 RHOR-6021 )
	RHOR-4323=CAAL-1686
	RHOR-M42=CAAL-1686
]
[ GFE-0091.002 , type = 1
	NECR-9362
	RHOR-4323
	RHOR-M3956 ( RHOR-6021 RHOR-10173 RHOR-10178 RHOR-10170 RHOR-10172 )
	RHOR-4323=NECR-9362
	RHOR-M3956=NECR-9362
]
[ GFE-0091.003 , type = 1
	RHOR-4323
	RHOR-M5598 ( RHOR-10182 RHOR-10188 RHOR-10189 RHOR-6884 RHOR-6021 RHOR-7406 RHOR-8590 RHOR-10170 RHOR-10175 )
	SCPO-4153
	RHOR-4323=SCPO-4153
	RHOR-M5598=SCPO-4153
]
[ GFE-0091.004 , type = 1
	CRNE-5506
	RHOR-4323
	RHOR-M1279 ( RHOR-10170 RHOR-6021 )
	RHOR-4323=CRNE-5506
	RHOR-M1279=CRNE-5506
]
[ GFE-0092 , type = 1
	CRNE-1859
	RHOR-1850
	RHOR-1851
	RHOR-1850=CRNE-1859
	RHOR-1851=CRNE-1859
]
[ GFE-0093 , type = 1
	ASNI-1391
	CAAL-3184
	CAAL-3185
	CAAL-3184=ASNI-1391
	CAAL-3185=ASNI-1391
]
[ GFE-0094 , type = 1
	RHOR-1376
	RHOR-M6557 ( RHOR-7057 RHOR-8418 RHOR-9854 RHOR-9855 )
	RHOR-M6827 ( RHOR-8420 RHOR-1017 RHOR-230 RHOR-9856 RHOR-3454 RHOR-4745 )
	RHOR-M6557=RHOR-1376
	RHOR-M6827=RHOR-1376
]
[ GFE-0095 , type = 2
	ASNI-6588
	RHOR-8109
	RHOR-M183 ( RHOR-1611 RHOR-7492 )
	SCPO-1001
	SCPO-2919
	RHOR-8109=ASNI-6588
	RHOR-M183=ASNI-6588
	SCPO-1001=ASNI-6588
	SCPO-2919=ASNI-6588
]
[ GFE-0096.001 , type = 1
	RHOR-10353
	RHOR-10438
	RHOR-10722
	RHOR-10438=RHOR-10353
	RHOR-10722=RHOR-10353
]
[ GFE-0096.002 , type = 1
	RHOR-10353
	RHOR-10722
	RHOR-M3151 ( RHOR-1431 RHOR-9883 )
	RHOR-M3151=RHOR-10722
	RHOR-10353=RHOR-10722
]
[ GFE-0097.001 , type = 1
	CAAL-4544
	CAAL-4545
	SACE-4125
	CAAL-4544=SACE-4125
	CAAL-4545=SACE-4125
]
[ GFE-0097.002 , type = 3
	CAAL-4544
	CAAL-4545
	ERGO-2503
	KLLA-856
	CAAL-4544=ERGO-2503
	CAAL-4544=KLLA-856
	CAAL-4545=ERGO-2503
	CAAL-4545=KLLA-856
]
[ GFE-0098 , type = 2
	ASNI-1574
	ASNI-M3180 ( ASNI-7239 ASNI-5677 ASNI-7237 )
	ASNI-M3993 ( ASNI-7270 ASNI-7272 )
	NECR-17
	NECR-9320
	ASNI-M3180=ASNI-1574
	ASNI-M3993=ASNI-1574
	NECR-17=ASNI-1574
	NECR-9320=ASNI-1574
]
[ GFE-0099 , type = 1
	ERGO-1996
	ERGO-2917
	NECR-2071
	ERGO-1996=NECR-2071
	ERGO-2917=NECR-2071
]
[ GFE-0100 , type = 1
	RHOR-4504
	RHOR-M3113 ( RHOR-3525 RHOR-10225 RHOR-10227 )
	RHOR-M3664 ( RHOR-4506 RHOR-6882 )
	RHOR-M3113=RHOR-4504
	RHOR-M3664=RHOR-4504
]
[ GFE-0101 , type = 2
	RHOR-3114
	RHOR-354
	RHOR-6493
	YALI-2715
	YALI-M1130 ( YALI-3658 YALI-5059 )
	RHOR-3114=RHOR-6493
	RHOR-354=RHOR-6493
	YALI-2715=RHOR-6493
	YALI-M1130=RHOR-6493
]
[ GFE-0102 , type = 1
	ASNI-5106
	RHOR-2230
	RHOR-7526
	RHOR-2230=ASNI-5106
	RHOR-7526=ASNI-5106
]
[ GFE-0103 , type = 1
	ASNI-5147
	ASNI-7197
	ASNI-M8435 ( ASNI-7195 ASNI-7196 ASNI-7198 ASNI-7199 ASNI-7201 ASNI-7203 ASNI-7205 ASNI-7207 ASNI-7209 ASNI-7210 ASNI-7211 ASNI-1283 ASNI-1548 ASNI-1899 ASNI-3201 ASNI-3821 ASNI-3999 ASNI-5173 ASNI-5947 ASNI-6489 ASNI-7194 )
	ASNI-5147=ASNI-7197
	ASNI-M8435=ASNI-7197
]
[ GFE-0104.001 , type = 1
	ERGO-3883
	RHOR-6352
	RHOR-M1625 ( RHOR-8019 RHOR-2478 RHOR-6351 )
	RHOR-6352=ERGO-3883
	RHOR-M1625=ERGO-3883
]
[ GFE-0104.002 , type = 1
	RHOR-2983
	RHOR-6352
	RHOR-M62 ( RHOR-2478 RHOR-6351 )
	RHOR-6352=RHOR-2983
	RHOR-M62=RHOR-2983
]
[ GFE-0105 , type = 1
	CAAL-4698
	ERGO-2042
	ERGO-2964
	ERGO-2042=CAAL-4698
	ERGO-2964=CAAL-4698
]
[ GFE-0106 , type = 3
	ASNI-5657
	NECR-9373
	RHOR-6228
	RHOR-9885
	RHOR-6228=ASNI-5657
	RHOR-6228=NECR-9373
	RHOR-9885=ASNI-5657
	RHOR-9885=NECR-9373
]
[ GFE-0107 , type = 1
	CAAL-2263
	CAAL-708
	DEHA-4364
	CAAL-2263=DEHA-4364
	CAAL-708=DEHA-4364
]
[ GFE-0108 , type = 1
	SACE-1777
	SACE-4626
	SACE-4934
	SACE-4626=SACE-1777
	SACE-4934=SACE-1777
]
[ GFE-0109 , type = 1
	RHOR-2545
	RHOR-407
	RHOR-M2817 ( RHOR-9962 RHOR-9963 RHOR-1950 RHOR-2379 )
	RHOR-2545=RHOR-407
	RHOR-M2817=RHOR-407
]
[ GFE-0110.001 , type = 1
	RHOR-10893
	RHOR-10951
	RHOR-M6816 ( RHOR-10960 RHOR-10961 RHOR-6602 RHOR-10902 RHOR-10924 RHOR-761 RHOR-10931 RHOR-10944 RHOR-10948 RHOR-10956 RHOR-10957 RHOR-10959 )
	RHOR-10951=RHOR-10893
	RHOR-M6816=RHOR-10893
]
[ GFE-0111 , type = 2
	ASNI-2511
	CAAL-1210
	CAAL-2409
	CAGL-2076
	CAGL-3236
	CRNE-1389
	CRNE-3744
	DEHA-2540
	DEHA-4827
	ERGO-153
	ERGO-1998
	KLLA-1713
	KLLA-3082
	RHOR-2676
	RHOR-851
	SCPO-2380
	SCPO-3332
	YALI-2318
	YALI-652
	CAAL-1210=ASNI-2511
	CAAL-2409=ASNI-2511
	CAGL-2076=ASNI-2511
	CAGL-3236=ASNI-2511
	CRNE-1389=ASNI-2511
	CRNE-3744=ASNI-2511
	DEHA-2540=ASNI-2511
	DEHA-4827=ASNI-2511
	ERGO-153=ASNI-2511
	ERGO-1998=ASNI-2511
	KLLA-1713=ASNI-2511
	KLLA-3082=ASNI-2511
	RHOR-2676=ASNI-2511
	RHOR-851=ASNI-2511
	SCPO-2380=ASNI-2511
	SCPO-3332=ASNI-2511
	YALI-2318=ASNI-2511
	YALI-652=ASNI-2511
]
[ GFE-0112 , type = 1
	ASNI-6154
	ASNI-7322
	ASNI-M122 ( ASNI-5583 ASNI-7324 )
	ASNI-6154=ASNI-7322
	ASNI-M122=ASNI-7322
]
[ GFE-0113.001 , type = 1
	RHOR-10309
	RHOR-10364
	RHOR-M9558 ( RHOR-7460 RHOR-8129 )
	RHOR-10364=RHOR-10309
	RHOR-M9558=RHOR-10309
]
[ GFE-0114 , type = 1
	CRNE-461
	CRNE-5045
	CRNE-M1714 ( CRNE-4148 CRNE-1666 CRNE-2152 )
	CRNE-461=CRNE-5045
	CRNE-M1714=CRNE-5045
]
[ GFE-0115 , type = 1
	RHOR-10840
	RHOR-M4840 ( RHOR-10915 RHOR-10942 )
	RHOR-M6570 ( RHOR-6084 RHOR-10862 RHOR-10884 RHOR-10904 RHOR-10907 RHOR-10929 RHOR-3004 )
	RHOR-M4840=RHOR-10840
	RHOR-M6570=RHOR-10840
]
[ GFE-0116.001 , type = 2
	ASNI-2378
	CAAL-4199
	CAAL-4775
	CAGL-2469
	CAGL-551
	CRNE-3733
	CRNE-51
	DEHA-690
	DEHA-866
	ERGO-2278
	ERGO-738
	KLLA-2253
	KLLA-3253
	NECR-2069
	NECR-2136
	RHOR-2179
	RHOR-5880
	SACE-1547
	SACE-244
	SCPO-1450
	SCPO-242
	YALI-1966
	YALI-4990
	CAAL-4199=ASNI-2378
	CAAL-4775=ASNI-2378
	CAGL-2469=ASNI-2378
[truncated: 20,602 more rows]
